# Supplementary material for: MRI-Based Deep Learning Method for Classification of IDH Mutation Status
Source: MDPI journal article supplement (doi:10.3390/bioengineering10091045), 2023-09-05
Supplement: s1 [file s1]

# MRI-Based Deep Learning Method for Classification of IDH Mutation Status

Chandan Ganesh Bangalore Yogananda <sup>1,\*</sup>, Benjamin C. Wagner <sup>1</sup>, Nghi C. D. Truong <sup>1</sup>, James M. Holcomb <sup>1</sup>, Divya D. Reddy <sup>1</sup>, Niloufar Saadat <sup>1</sup>, Kimmo J. Hatanpaa <sup>2</sup>, Toral R. Patel <sup>3</sup>, Baowei Fei <sup>1,4</sup>, Matthew D. Lee <sup>5</sup>, Rajan Jain <sup>5,6</sup>, Richard J. Bruce <sup>7</sup>, Marco C. Pinho <sup>1</sup>, Ananth J. Madhuranthakam <sup>1</sup> and Joseph A. Maldjian <sup>1</sup>

<sup>1</sup> Department of Radiology, University of Texas Southwestern Medical Center, 75390 Dallas, TX, USA; ben.wagner@utsouthwestern.edu (B.C.W.); nghi.truong@utsouthwestern.edu (N.C.D.T.); james.holcomb@utsouthwestern.edu (J.M.H.); divya.reddy@utsouthwestern.edu (D.D.R.); niloufar.saadat@utsouthwestern.edu (N.S.); bfei@utdallas.edu (B.F.); marco.pinho@utsouthwestern.edu (M.C.P.); ananth.madhuranthakam@utsouthwestern.edu (A.J.M.); joseph.maldjian@utsouthwestern.edu (J.A.M.)

<sup>2</sup> Department of Pathology, University of Texas Southwestern Medical Center, 75390 Dallas, TX, USA; kimmo.hatanpaa@utsouthwestern.edu

<sup>3</sup> Department of Neurological Surgery, University of Texas Southwestern Medical Center, 75390 Dallas, TX, USA; toral.patel@utsouthwestern.edu

<sup>4</sup> Department of Bioengineering, University of Texas at Dallas, 75080 Richardson, TX, USA

<sup>5</sup> Department of Radiology, NYU Grossman School of Medicine, 10016 New York, NY, USA; matthew.lee4@nyulangone.org (M.D.L.); rajan.jain@nyulangone.org (R.J.)

<sup>6</sup> Department of Neurosurgery, NYU Grossman School of Medicine, 10016 New York, NY, USA

<sup>7</sup> Department of Radiology, University of Wisconsin School of Medicine and Public Health, 53726 Madison, WI, USA; rbruce@uwhealth.org

\* Correspondence: chandanganesh.bangaloreyogananda@utsouthwestern.edu

## 1. ROC Methodology

The network output classifies voxels in the tumor as IDH mutated or IDH wildtype. The percentage of IDH-mutated voxels was computed for the network output for each subject in the test set by dividing the predicted IDH-mutated voxels by the total number of predicted voxels in each tumor. The percentage of mutated voxels can be viewed as a network output prediction likelihood of the tumor being IDH mutated. Note that, in the manuscript, majority voting (the 50% threshold) was used to determine IDH prediction. For the ROC analysis, the percentage of IDH-mutated voxels was sorted and used as separate thresholds (cut points) to determine IDH mutation status for the subjects across the test set for each new cut point. The resulting predicted IDH class membership was compared to the ground truth values to determine sensitivity (true-positive rate) and 1- specificity (false-positive rate) at each threshold. The resulting values were plotted using R programming to obtain an ROC curve (true-positive rate against false-positive rate). Routines in R programming were used to fit the curves and determine the area under the curve (AUC). This procedure was repeated for both T2-net and MC-net and their two training combinations. Smoothed curves were used to facilitate displaying the figure.

**Table S1.** Training subjects and corresponding IDH status.

| <b>Subject ID</b>     | <b>IDH Status</b> |
|-----------------------|-------------------|
| TCGA-06-0128_19990218 | mutated           |
| TCGA-06-0129_20000314 | mutated           |
| TCGA-06-2570_20070726 | mutated           |
| TCGA-06-5417_20080903 | mutated           |
| TCGA-06-6389_20090404 | mutated           |
| TCGA-14-1456_19990422 | mutated           |
| TCGA-CS-4942_19970222 | mutated           |
| TCGA-CS-4943_20000902 | mutated           |
| TCGA-CS-4944_20010208 | mutated           |
| TCGA-CS-5393_19990606 | mutated           |
| TCGA-CS-5396_20010302 | mutated           |
| TCGA-CS-6290_20000917 | mutated           |
| TCGA-CS-6665_20010817 | mutated           |
| TCGA-CS-6666_20011109 | mutated           |
| TCGA-CS-6667_20011105 | mutated           |
| TCGA-CS-6668_20011025 | mutated           |
| TCGA-DU-5849_19950405 | mutated           |
| TCGA-DU-5851_19950428 | mutated           |
| TCGA-DU-5853_19950823 | mutated           |
| TCGA-DU-5855_19951217 | mutated           |
| TCGA-DU-5871_19941206 | mutated           |
| TCGA-DU-5872_19950223 | mutated           |
| TCGA-DU-5874_19950510 | mutated           |
| TCGA-DU-6395_19830209 | mutated           |
| TCGA-DU-6397_19850130 | mutated           |
| TCGA-DU-6399_19830416 | mutated           |
| TCGA-DU-6400_19830518 | mutated           |
| TCGA-DU-6401_19831101 | mutated           |
| TCGA-DU-6407_19860514 | mutated           |
| TCGA-DU-6408_19860521 | mutated           |
| TCGA-DU-7008_19830723 | mutated           |
| TCGA-DU-7010_19860307 | mutated           |
| TCGA-DU-7015_19890618 | mutated           |
| TCGA-DU-7018_19911220 | mutated           |
| TCGA-DU-7019_19940908 | mutated           |
| TCGA-DU-7294_19890104 | mutated           |
| TCGA-DU-7298_19910324 | mutated           |
| TCGA-DU-7299_19910417 | mutated           |
| TCGA-DU-7300_19910814 | mutated           |
| TCGA-DU-7301_19911112 | mutated           |
| TCGA-DU-7302_19911203 | mutated           |
| TCGA-DU-7304_19930325 | mutated           |

|                       |         |
|-----------------------|---------|
| TCGA-DU-7306_19930512 | mutated |
| TCGA-DU-7309_19960831 | mutated |
| TCGA-DU-8164_19970111 | mutated |
| TCGA-DU-8166_19970322 | mutated |
| TCGA-DU-8167_19970402 | mutated |
| TCGA-DU-8168_19970503 | mutated |
| TCGA-DU-A5TP_19970614 | mutated |
| TCGA-DU-A5TR_19970726 | mutated |
| TCGA-DU-A5TS_19970726 | mutated |
| TCGA-DU-A5TU_19980312 | mutated |
| TCGA-DU-A5TW_19980228 | mutated |
| TCGA-DU-A6S2_19980404 | mutated |
| TCGA-DU-A6S3_19980711 | mutated |
| TCGA-DU-A6S6_19920521 | mutated |
| TCGA-DU-A6S7_19980513 | mutated |
| TCGA-DU-A6S8_19980620 | mutated |
| TCGA-FG-5964_20010511 | mutated |
| TCGA-FG-6689_20020326 | mutated |
| TCGA-FG-6690_20020226 | mutated |
| TCGA-FG-6691_20020405 | mutated |
| TCGA-FG-7634_20000128 | mutated |
| TCGA-FG-8189_20030516 | mutated |
| TCGA-FG-A4MT_20020212 | mutated |
| TCGA-FG-A6IZ_20040220 | mutated |
| TCGA-FG-A713_20040709 | mutated |
| TCGA-HT-7473_19970826 | mutated |
| TCGA-HT-7475_19970918 | mutated |
| TCGA-HT-7602_19951103 | mutated |
| TCGA-HT-7605_19950916 | mutated |
| TCGA-HT-7608_19940304 | mutated |
| TCGA-HT-7616_19940813 | mutated |
| TCGA-HT-7684_19950816 | mutated |
| TCGA-HT-7686_19950629 | mutated |
| TCGA-HT-7690_19960312 | mutated |
| TCGA-HT-7692_19960724 | mutated |
| TCGA-HT-7693_19950520 | mutated |
| TCGA-HT-7694_19950404 | mutated |
| TCGA-HT-7855_19951020 | mutated |
| TCGA-HT-7856_19950831 | mutated |
| TCGA-HT-7874_19950902 | mutated |
| TCGA-HT-7879_19981009 | mutated |
| TCGA-HT-7884_19980913 | mutated |
| TCGA-HT-8018_19970411 | mutated |
| TCGA-HT-8105_19980826 | mutated |

|                       |          |
|-----------------------|----------|
| TCGA-HT-8106_19970727 | mutated  |
| TCGA-HT-8111_19980330 | mutated  |
| TCGA-HT-8113_19930809 | mutated  |
| TCGA-HT-8114_19981030 | mutated  |
| TCGA-HT-8563_19981209 | mutated  |
| TCGA-HT-A61A_20000127 | mutated  |
| W153                  | mutated  |
| W21                   | mutated  |
| TCGA-02-0003_19970608 | wildtype |
| TCGA-02-0006_19960823 | wildtype |
| TCGA-02-0009_19970614 | wildtype |
| TCGA-02-0011_19980201 | wildtype |
| TCGA-02-0027_19990328 | wildtype |
| TCGA-02-0033_19970526 | wildtype |
| TCGA-02-0034_19970727 | wildtype |
| TCGA-02-0037_19980113 | wildtype |
| TCGA-02-0046_19981128 | wildtype |
| TCGA-02-0047_19981215 | wildtype |
| TCGA-02-0048_19990129 | wildtype |
| TCGA-02-0060_20000228 | wildtype |
| TCGA-02-0064_19990808 | wildtype |
| TCGA-02-0068_20000516 | wildtype |
| TCGA-02-0069_20000528 | wildtype |
| TCGA-02-0070_20000710 | wildtype |
| TCGA-02-0075_19990924 | wildtype |
| TCGA-02-0086_19990725 | wildtype |
| TCGA-02-0102_19971215 | wildtype |
| TCGA-06-0119_20031226 | wildtype |
| TCGA-06-0122_20040914 | wildtype |
| TCGA-06-0132_20050517 | wildtype |
| TCGA-06-0133_20050510 | wildtype |
| TCGA-06-0137_20011224 | wildtype |
| TCGA-06-0138_20021125 | wildtype |
| TCGA-06-0142_20000311 | wildtype |
| TCGA-06-0143_20050211 | wildtype |
| TCGA-06-0145_20001106 | wildtype |
| TCGA-06-0147_19970610 | wildtype |
| TCGA-06-0154_19960405 | wildtype |
| TCGA-06-0158_19960905 | wildtype |
| TCGA-06-0166_19990601 | wildtype |
| TCGA-06-0168_20000812 | wildtype |
| TCGA-06-0173_20011105 | wildtype |
| TCGA-06-0174_20011109 | wildtype |
| TCGA-06-0176_20020409 | wildtype |

|                           |          |
|---------------------------|----------|
| TCGA-06-0184_20030713     | wildtype |
| TCGA-06-0185_20031107     | wildtype |
| TCGA-06-0187_20040707     | wildtype |
| TCGA-06-0188_20040717     | wildtype |
| TCGA-06-0189_20041002     | wildtype |
| TCGA-06-0190_20041210_DUP | wildtype |
| TCGA-06-0192_20050408     | wildtype |
| TCGA-06-0213_19961023     | wildtype |
| TCGA-06-0237_20050201     | wildtype |
| TCGA-06-0238_20050412     | wildtype |
| TCGA-06-0241_20050830     | wildtype |
| TCGA-06-0644_20051128     | wildtype |
| TCGA-06-0645_20051130     | wildtype |
| TCGA-06-0646_20051209     | wildtype |
| TCGA-06-0648_20060120     | wildtype |
| TCGA-06-0649_20060126     | wildtype |
| TCGA-06-0881_20070208     | wildtype |
| TCGA-06-1806_20070602     | wildtype |
| TCGA-06-5412_20080603     | wildtype |
| TCGA-06-5413_20080617     | wildtype |
| TCGA-12-0616_19990412     | wildtype |
| TCGA-12-0829_19990602     | wildtype |
| TCGA-12-1093_19990920     | wildtype |
| TCGA-12-1598_19990823     | wildtype |
| TCGA-12-1601_20000619     | wildtype |
| TCGA-12-1602_20010304     | wildtype |
| TCGA-12-3650_20010729     | wildtype |
| TCGA-14-0789_19971119     | wildtype |
| TCGA-14-1794_19980411     | wildtype |
| TCGA-14-1829_20010614     | wildtype |
| TCGA-14-3477_20020501     | wildtype |
| TCGA-19-1390_20010320     | wildtype |
| TCGA-19-1789_20020810     | wildtype |
| TCGA-19-2624_20021210     | wildtype |
| TCGA-19-2631_20030302     | wildtype |
| TCGA-19-5954_20031230     | wildtype |
| TCGA-19-5958_20040309     | wildtype |
| TCGA-27-1835_19880731     | wildtype |
| TCGA-27-1838_19880829     | wildtype |
| TCGA-76-4926_19960329     | wildtype |
| TCGA-76-4932_19970316     | wildtype |
| TCGA-76-4934_20001008     | wildtype |
| TCGA-76-4935_20010122     | wildtype |
| TCGA-76-6191_20001020     | wildtype |
| TCGA-76-6192_20010525     | wildtype |
| TCGA-76-6193_20010602     | wildtype |

|                       |          |
|-----------------------|----------|
| TCGA-76-6280_19980721 | wildtype |
| TCGA-76-6282_19980824 | wildtype |
| TCGA-76-6285_19981219 | wildtype |
| TCGA-76-6656_20010602 | wildtype |
| TCGA-76-6657_20010611 | wildtype |
| TCGA-76-6661_20011208 | wildtype |
| TCGA-76-6662_20011213 | wildtype |
| TCGA-76-6663_20011227 | wildtype |
| TCGA-76-6664_20020110 | wildtype |
| TCGA-CS-4941_19960909 | wildtype |
| TCGA-CS-5395_19981004 | wildtype |
| TCGA-CS-5397_20010315 | wildtype |
| TCGA-CS-6186_20000601 | wildtype |
| TCGA-CS-6188_20010812 | wildtype |
| TCGA-CS-6669_20020102 | wildtype |
| TCGA-DU-5852_19950709 | wildtype |
| TCGA-DU-5854_19951104 | wildtype |
| TCGA-DU-6404_19850629 | wildtype |
| TCGA-DU-6405_19851005 | wildtype |
| TCGA-DU-8162_19961029 | wildtype |
| TCGA-DU-8165_19970205 | wildtype |
| TCGA-DU-A5TT_19980318 | wildtype |
| TCGA-DU-A5TY_19970709 | wildtype |
| TCGA-FG-6688_20020215 | wildtype |
| TCGA-FG-6692_20020606 | wildtype |
| TCGA-HT-7680_19970202 | wildtype |
| TCGA-HT-7860_19960513 | wildtype |
| TCGA-HT-7882_19970125 | wildtype |
| TCGA-HT-8107_19980708 | wildtype |
| TCGA-HT-A5RC_19990831 | wildtype |
| W100                  | wildtype |
| W102                  | wildtype |
| W187                  | wildtype |
| W2                    | wildtype |
| W23                   | wildtype |
| W26                   | wildtype |
| W3                    | wildtype |
| W5                    | wildtype |
| W57                   | wildtype |
| W6                    | wildtype |
| W7                    | wildtype |
| W71                   | wildtype |
| W74                   | wildtype |
| W76                   | wildtype |
| W80                   | wildtype |
| W84                   | wildtype |

|             |          |
|-------------|----------|
| W9          | wildtype |
| W91         | wildtype |
| W93         | wildtype |
| W96         | wildtype |
| W98         | wildtype |
| MR_EGD-0004 | mutated  |
| MR_EGD-0008 | mutated  |
| MR_EGD-0009 | wildtype |
| MR_EGD-0011 | mutated  |
| MR_EGD-0014 | wildtype |
| MR_EGD-0015 | wildtype |
| MR_EGD-0020 | mutated  |
| MR_EGD-0022 | mutated  |
| MR_EGD-0024 | mutated  |
| MR_EGD-0026 | wildtype |
| MR_EGD-0029 | mutated  |
| MR_EGD-0031 | wildtype |
| MR_EGD-0033 | mutated  |
| MR_EGD-0034 | wildtype |
| MR_EGD-0035 | wildtype |
| MR_EGD-0041 | wildtype |
| MR_EGD-0045 | wildtype |
| MR_EGD-0047 | mutated  |
| MR_EGD-0050 | wildtype |
| MR_EGD-0052 | wildtype |
| MR_EGD-0053 | wildtype |
| MR_EGD-0055 | wildtype |
| MR_EGD-0057 | mutated  |
| MR_EGD-0058 | wildtype |
| MR_EGD-0059 | wildtype |
| MR_EGD-0062 | mutated  |
| MR_EGD-0064 | wildtype |
| MR_EGD-0066 | mutated  |
| MR_EGD-0067 | wildtype |
| MR_EGD-0068 | mutated  |
| MR_EGD-0072 | mutated  |
| MR_EGD-0073 | wildtype |
| MR_EGD-0074 | mutated  |
| MR_EGD-0075 | wildtype |
| MR_EGD-0078 | mutated  |
| MR_EGD-0080 | wildtype |
| MR_EGD-0081 | wildtype |
| MR_EGD-0083 | wildtype |
| MR_EGD-0085 | wildtype |
| MR_EGD-0086 | mutated  |
| MR_EGD-0088 | wildtype |

|             |          |
|-------------|----------|
| MR_EGD-0089 | wildtype |
| MR_EGD-0090 | mutated  |
| MR_EGD-0094 | wildtype |
| MR_EGD-0097 | wildtype |
| MR_EGD-0099 | wildtype |
| MR_EGD-0100 | wildtype |
| MR_EGD-0101 | mutated  |
| MR_EGD-0102 | wildtype |
| MR_EGD-0105 | wildtype |
| MR_EGD-0106 | mutated  |
| MR_EGD-0107 | mutated  |
| MR_EGD-0109 | wildtype |
| MR_EGD-0110 | wildtype |
| MR_EGD-0111 | wildtype |
| MR_EGD-0112 | wildtype |
| MR_EGD-0114 | wildtype |
| MR_EGD-0115 | wildtype |
| MR_EGD-0117 | wildtype |
| MR_EGD-0118 | mutated  |
| MR_EGD-0121 | wildtype |
| MR_EGD-0122 | mutated  |
| MR_EGD-0123 | mutated  |
| MR_EGD-0126 | wildtype |
| MR_EGD-0127 | wildtype |
| MR_EGD-0128 | mutated  |
| MR_EGD-0131 | wildtype |
| MR_EGD-0132 | wildtype |
| MR_EGD-0133 | mutated  |
| MR_EGD-0134 | wildtype |
| MR_EGD-0137 | mutated  |
| MR_EGD-0141 | wildtype |
| MR_EGD-0143 | mutated  |
| MR_EGD-0144 | wildtype |
| MR_EGD-0145 | mutated  |
| MR_EGD-0146 | mutated  |
| MR_EGD-0152 | wildtype |
| MR_EGD-0155 | wildtype |
| MR_EGD-0156 | wildtype |
| MR_EGD-0158 | wildtype |
| MR_EGD-0160 | mutated  |
| MR_EGD-0161 | wildtype |
| MR_EGD-0162 | mutated  |
| MR_EGD-0165 | wildtype |
| MR_EGD-0166 | wildtype |
| MR_EGD-0167 | wildtype |
| MR_EGD-0168 | wildtype |

|             |          |
|-------------|----------|
| MR_EGD-0171 | wildtype |
| MR_EGD-0172 | wildtype |
| MR_EGD-0176 | wildtype |
| MR_EGD-0177 | mutated  |
| MR_EGD-0179 | mutated  |
| MR_EGD-0182 | wildtype |
| MR_EGD-0183 | wildtype |
| MR_EGD-0185 | mutated  |
| MR_EGD-0186 | mutated  |
| MR_EGD-0187 | mutated  |
| MR_EGD-0188 | mutated  |
| MR_EGD-0191 | mutated  |
| MR_EGD-0192 | wildtype |
| MR_EGD-0193 | wildtype |
| MR_EGD-0194 | mutated  |
| MR_EGD-0196 | wildtype |
| MR_EGD-0197 | wildtype |
| MR_EGD-0198 | wildtype |
| MR_EGD-0199 | mutated  |
| MR_EGD-0202 | wildtype |
| MR_EGD-0203 | mutated  |
| MR_EGD-0204 | wildtype |
| MR_EGD-0206 | wildtype |
| MR_EGD-0208 | mutated  |
| MR_EGD-0211 | mutated  |
| MR_EGD-0213 | wildtype |
| MR_EGD-0214 | mutated  |
| MR_EGD-0215 | wildtype |
| MR_EGD-0216 | wildtype |
| MR_EGD-0217 | mutated  |
| MR_EGD-0218 | wildtype |
| MR_EGD-0219 | wildtype |
| MR_EGD-0221 | mutated  |
| MR_EGD-0222 | wildtype |
| MR_EGD-0223 | wildtype |
| MR_EGD-0224 | wildtype |
| MR_EGD-0226 | wildtype |
| MR_EGD-0227 | mutated  |
| MR_EGD-0228 | mutated  |
| MR_EGD-0229 | mutated  |
| MR_EGD-0230 | mutated  |
| MR_EGD-0232 | wildtype |
| MR_EGD-0233 | mutated  |
| MR_EGD-0234 | wildtype |
| MR_EGD-0236 | mutated  |
| MR_EGD-0237 | wildtype |

|             |          |
|-------------|----------|
| MR_EGD-0238 | wildtype |
| MR_EGD-0240 | mutated  |
| MR_EGD-0241 | mutated  |
| MR_EGD-0242 | wildtype |
| MR_EGD-0243 | mutated  |
| MR_EGD-0244 | mutated  |
| MR_EGD-0247 | wildtype |
| MR_EGD-0249 | wildtype |
| MR_EGD-0250 | wildtype |
| MR_EGD-0253 | mutated  |
| MR_EGD-0254 | wildtype |
| MR_EGD-0255 | wildtype |
| MR_EGD-0256 | wildtype |
| MR_EGD-0262 | wildtype |
| MR_EGD-0263 | wildtype |
| MR_EGD-0264 | wildtype |
| MR_EGD-0266 | wildtype |
| MR_EGD-0268 | mutated  |
| MR_EGD-0270 | wildtype |
| MR_EGD-0273 | wildtype |
| MR_EGD-0275 | wildtype |
| MR_EGD-0276 | mutated  |
| MR_EGD-0279 | mutated  |
| MR_EGD-0280 | wildtype |
| MR_EGD-0281 | wildtype |
| MR_EGD-0282 | wildtype |
| MR_EGD-0285 | wildtype |
| MR_EGD-0286 | mutated  |
| MR_EGD-0290 | wildtype |
| MR_EGD-0292 | wildtype |
| MR_EGD-0293 | wildtype |
| MR_EGD-0294 | wildtype |
| MR_EGD-0297 | mutated  |
| MR_EGD-0298 | wildtype |
| MR_EGD-0299 | wildtype |
| MR_EGD-0301 | mutated  |
| MR_EGD-0302 | wildtype |
| MR_EGD-0303 | wildtype |
| MR_EGD-0304 | wildtype |
| MR_EGD-0305 | wildtype |
| MR_EGD-0306 | mutated  |
| MR_EGD-0308 | mutated  |
| MR_EGD-0311 | wildtype |
| MR_EGD-0312 | mutated  |
| MR_EGD-0313 | wildtype |
| MR_EGD-0314 | wildtype |

|             |          |
|-------------|----------|
| MR_EGD-0315 | wildtype |
| MR_EGD-0317 | wildtype |
| MR_EGD-0318 | wildtype |
| MR_EGD-0319 | wildtype |
| MR_EGD-0321 | wildtype |
| MR_EGD-0323 | wildtype |
| MR_EGD-0324 | wildtype |
| MR_EGD-0325 | wildtype |
| MR_EGD-0328 | wildtype |
| MR_EGD-0329 | wildtype |
| MR_EGD-0330 | mutated  |
| MR_EGD-0331 | wildtype |
| MR_EGD-0332 | mutated  |
| MR_EGD-0334 | wildtype |
| MR_EGD-0336 | wildtype |
| MR_EGD-0337 | wildtype |
| MR_EGD-0338 | wildtype |
| MR_EGD-0340 | mutated  |
| MR_EGD-0342 | wildtype |
| MR_EGD-0343 | wildtype |
| MR_EGD-0344 | wildtype |
| MR_EGD-0345 | wildtype |
| MR_EGD-0346 | mutated  |
| MR_EGD-0349 | wildtype |
| MR_EGD-0351 | mutated  |
| MR_EGD-0352 | mutated  |
| MR_EGD-0353 | wildtype |
| MR_EGD-0354 | wildtype |
| MR_EGD-0355 | mutated  |
| MR_EGD-0356 | mutated  |
| MR_EGD-0357 | wildtype |
| MR_EGD-0358 | wildtype |
| MR_EGD-0363 | wildtype |
| MR_EGD-0365 | wildtype |
| MR_EGD-0366 | wildtype |
| MR_EGD-0367 | wildtype |
| MR_EGD-0368 | mutated  |
| MR_EGD-0369 | mutated  |
| MR_EGD-0370 | wildtype |
| MR_EGD-0375 | wildtype |
| MR_EGD-0376 | wildtype |
| MR_EGD-0377 | mutated  |
| MR_EGD-0378 | mutated  |
| MR_EGD-0380 | wildtype |
| MR_EGD-0381 | wildtype |
| MR_EGD-0382 | wildtype |

|             |          |
|-------------|----------|
| MR_EGD-0383 | wildtype |
| MR_EGD-0388 | wildtype |
| MR_EGD-0389 | wildtype |
| MR_EGD-0390 | wildtype |
| MR_EGD-0391 | wildtype |
| MR_EGD-0392 | wildtype |
| MR_EGD-0394 | wildtype |
| MR_EGD-0395 | wildtype |
| MR_EGD-0397 | wildtype |
| MR_EGD-0400 | wildtype |
| MR_EGD-0401 | wildtype |
| MR_EGD-0402 | mutated  |
| MR_EGD-0403 | mutated  |
| MR_EGD-0405 | wildtype |
| MR_EGD-0407 | wildtype |
| MR_EGD-0410 | mutated  |
| MR_EGD-0411 | mutated  |
| MR_EGD-0412 | wildtype |
| MR_EGD-0413 | mutated  |
| MR_EGD-0414 | wildtype |
| MR_EGD-0415 | mutated  |
| MR_EGD-0416 | wildtype |
| MR_EGD-0417 | wildtype |
| MR_EGD-0418 | wildtype |
| MR_EGD-0420 | mutated  |
| MR_EGD-0421 | mutated  |
| MR_EGD-0423 | wildtype |
| MR_EGD-0424 | wildtype |
| MR_EGD-0425 | wildtype |
| MR_EGD-0426 | mutated  |
| MR_EGD-0427 | wildtype |
| MR_EGD-0428 | wildtype |
| MR_EGD-0430 | wildtype |
| MR_EGD-0431 | wildtype |
| MR_EGD-0432 | wildtype |
| MR_EGD-0433 | wildtype |
| MR_EGD-0434 | mutated  |
| MR_EGD-0438 | wildtype |
| MR_EGD-0439 | mutated  |
| MR_EGD-0440 | wildtype |
| MR_EGD-0442 | wildtype |
| MR_EGD-0443 | wildtype |
| MR_EGD-0447 | wildtype |
| MR_EGD-0448 | wildtype |
| MR_EGD-0449 | wildtype |
| MR_EGD-0450 | mutated  |

|             |          |
|-------------|----------|
| MR_EGD-0451 | wildtype |
| MR_EGD-0452 | wildtype |
| MR_EGD-0453 | mutated  |
| MR_EGD-0455 | wildtype |
| MR_EGD-0460 | wildtype |
| MR_EGD-0461 | mutated  |
| MR_EGD-0463 | wildtype |
| MR_EGD-0464 | wildtype |
| MR_EGD-0466 | mutated  |
| MR_EGD-0469 | wildtype |
| MR_EGD-0470 | wildtype |
| MR_EGD-0472 | mutated  |
| MR_EGD-0474 | mutated  |
| MR_EGD-0478 | wildtype |
| MR_EGD-0479 | wildtype |
| MR_EGD-0480 | wildtype |
| MR_EGD-0482 | wildtype |
| MR_EGD-0484 | wildtype |
| MR_EGD-0485 | wildtype |
| MR_EGD-0486 | wildtype |
| MR_EGD-0487 | mutated  |
| MR_EGD-0488 | wildtype |
| MR_EGD-0490 | mutated  |
| MR_EGD-0492 | mutated  |
| MR_EGD-0494 | wildtype |
| MR_EGD-0495 | mutated  |
| MR_EGD-0499 | mutated  |
| MR_EGD-0501 | wildtype |
| MR_EGD-0502 | wildtype |
| MR_EGD-0503 | wildtype |
| MR_EGD-0505 | wildtype |
| MR_EGD-0506 | wildtype |
| MR_EGD-0507 | wildtype |
| MR_EGD-0508 | wildtype |
| MR_EGD-0509 | mutated  |
| MR_EGD-0511 | mutated  |
| MR_EGD-0512 | wildtype |
| MR_EGD-0514 | mutated  |
| MR_EGD-0515 | wildtype |
| MR_EGD-0516 | wildtype |
| MR_EGD-0518 | mutated  |
| MR_EGD-0521 | mutated  |
| MR_EGD-0522 | wildtype |
| MR_EGD-0523 | mutated  |
| MR_EGD-0524 | wildtype |
| MR_EGD-0529 | wildtype |

|             |          |
|-------------|----------|
| MR_EGD-0530 | mutated  |
| MR_EGD-0531 | wildtype |
| MR_EGD-0532 | wildtype |
| MR_EGD-0535 | wildtype |
| MR_EGD-0536 | mutated  |
| MR_EGD-0537 | mutated  |
| MR_EGD-0539 | wildtype |
| MR_EGD-0541 | mutated  |
| MR_EGD-0543 | mutated  |
| MR_EGD-0544 | wildtype |
| MR_EGD-0545 | wildtype |
| MR_EGD-0547 | wildtype |
| MR_EGD-0548 | wildtype |
| MR_EGD-0549 | wildtype |
| MR_EGD-0552 | mutated  |
| MR_EGD-0553 | mutated  |
| MR_EGD-0557 | wildtype |
| MR_EGD-0558 | wildtype |
| MR_EGD-0561 | mutated  |
| MR_EGD-0563 | mutated  |
| MR_EGD-0564 | mutated  |
| MR_EGD-0565 | mutated  |
| MR_EGD-0567 | mutated  |
| MR_EGD-0568 | mutated  |
| MR_EGD-0571 | mutated  |
| MR_EGD-0572 | mutated  |
| MR_EGD-0575 | wildtype |
| MR_EGD-0577 | mutated  |
| MR_EGD-0578 | wildtype |
| MR_EGD-0579 | wildtype |
| MR_EGD-0580 | wildtype |
| MR_EGD-0581 | wildtype |
| MR_EGD-0585 | mutated  |
| MR_EGD-0586 | mutated  |
| MR_EGD-0587 | wildtype |
| MR_EGD-0589 | wildtype |
| MR_EGD-0591 | wildtype |
| MR_EGD-0592 | wildtype |
| MR_EGD-0593 | wildtype |
| MR_EGD-0594 | wildtype |
| MR_EGD-0595 | wildtype |
| MR_EGD-0596 | wildtype |
| MR_EGD-0598 | mutated  |
| MR_EGD-0599 | wildtype |
| MR_EGD-0600 | wildtype |
| MR_EGD-0601 | mutated  |

|             |          |
|-------------|----------|
| MR_EGD-0602 | wildtype |
| MR_EGD-0603 | wildtype |
| MR_EGD-0604 | wildtype |
| MR_EGD-0605 | wildtype |
| MR_EGD-0606 | mutated  |
| MR_EGD-0608 | wildtype |
| MR_EGD-0611 | wildtype |
| MR_EGD-0612 | wildtype |
| MR_EGD-0617 | wildtype |
| MR_EGD-0621 | wildtype |
| MR_EGD-0622 | wildtype |
| MR_EGD-0624 | wildtype |
| MR_EGD-0626 | mutated  |
| MR_EGD-0627 | wildtype |
| MR_EGD-0629 | wildtype |
| MR_EGD-0631 | mutated  |
| MR_EGD-0632 | wildtype |
| MR_EGD-0633 | mutated  |
| MR_EGD-0635 | wildtype |
| MR_EGD-0636 | mutated  |
| MR_EGD-0638 | mutated  |
| MR_EGD-0639 | wildtype |
| MR_EGD-0640 | wildtype |
| MR_EGD-0641 | wildtype |
| MR_EGD-0643 | wildtype |
| MR_EGD-0645 | wildtype |
| MR_EGD-0647 | mutated  |
| MR_EGD-0648 | wildtype |
| MR_EGD-0655 | mutated  |
| MR_EGD-0656 | mutated  |
| MR_EGD-0657 | wildtype |
| MR_EGD-0658 | wildtype |
| MR_EGD-0659 | wildtype |
| MR_EGD-0661 | wildtype |
| MR_EGD-0662 | mutated  |
| MR_EGD-0663 | wildtype |
| MR_EGD-0664 | wildtype |
| MR_EGD-0665 | wildtype |
| MR_EGD-0667 | wildtype |
| MR_EGD-0668 | mutated  |
| MR_EGD-0669 | wildtype |
| MR_EGD-0671 | wildtype |
| MR_EGD-0672 | wildtype |
| MR_EGD-0675 | wildtype |
| MR_EGD-0676 | wildtype |
| MR_EGD-0677 | wildtype |

|             |          |
|-------------|----------|
| MR_EGD-0687 | wildtype |
| MR_EGD-0688 | mutated  |
| MR_EGD-0689 | mutated  |
| MR_EGD-0691 | wildtype |
| MR_EGD-0692 | wildtype |
| MR_EGD-0693 | wildtype |
| MR_EGD-0694 | wildtype |
| MR_EGD-0697 | wildtype |
| MR_EGD-0699 | wildtype |
| MR_EGD-0700 | mutated  |
| MR_EGD-0702 | wildtype |
| MR_EGD-0703 | wildtype |
| MR_EGD-0705 | mutated  |
| MR_EGD-0706 | wildtype |
| MR_EGD-0707 | wildtype |
| MR_EGD-0709 | wildtype |
| MR_EGD-0710 | wildtype |
| MR_EGD-0715 | wildtype |
| MR_EGD-0720 | mutated  |
| MR_EGD-0723 | wildtype |
| MR_EGD-0725 | wildtype |
| MR_EGD-0729 | mutated  |
| MR_EGD-0734 | wildtype |
| MR_EGD-0735 | wildtype |
| MR_EGD-0736 | wildtype |
| MR_EGD-0737 | mutated  |
| MR_EGD-0738 | wildtype |
| MR_EGD-0739 | mutated  |
| MR_EGD-0741 | wildtype |
| MR_EGD-0742 | wildtype |
| MR_EGD-0744 | mutated  |
| MR_EGD-0745 | wildtype |
| MR_EGD-0747 | wildtype |
| MR_EGD-0753 | wildtype |
| MR_EGD-0754 | wildtype |
| MR_EGD-0757 | mutated  |
| MR_EGD-0758 | mutated  |
| MR_EGD-0759 | wildtype |
| MR_EGD-0760 | wildtype |
| MR_EGD-0762 | wildtype |
| MR_EGD-0763 | wildtype |
| MR_EGD-0764 | wildtype |
| MR_EGD-0765 | wildtype |
| MR_EGD-0766 | wildtype |
| MR_EGD-0768 | wildtype |
| MR_EGD-0771 | mutated  |

|             |          |
|-------------|----------|
| MR_EGD-0772 | wildtype |
| MR_EGD-0773 | mutated  |

**Table S2.** Hyperparameters used to develop the MC-net.

1

| Sl No. | Training Hyperparameters                                                                                                                                                                                                                                                                                                                                                                                                                                                                                                                                                                                                                                                                                                                                                                                                                                                                                                                                                                                                                                                                                                                                                                                                                                                                                                                                                                                                                                                                                                        |
|--------|---------------------------------------------------------------------------------------------------------------------------------------------------------------------------------------------------------------------------------------------------------------------------------------------------------------------------------------------------------------------------------------------------------------------------------------------------------------------------------------------------------------------------------------------------------------------------------------------------------------------------------------------------------------------------------------------------------------------------------------------------------------------------------------------------------------------------------------------------------------------------------------------------------------------------------------------------------------------------------------------------------------------------------------------------------------------------------------------------------------------------------------------------------------------------------------------------------------------------------------------------------------------------------------------------------------------------------------------------------------------------------------------------------------------------------------------------------------------------------------------------------------------------------|
| 1      | "_best_ema": "0.8365259113358365",                                                                                                                                                                                                                                                                                                                                                                                                                                                                                                                                                                                                                                                                                                                                                                                                                                                                                                                                                                                                                                                                                                                                                                                                                                                                                                                                                                                                                                                                                              |
| 2      | "batch_size": "100",                                                                                                                                                                                                                                                                                                                                                                                                                                                                                                                                                                                                                                                                                                                                                                                                                                                                                                                                                                                                                                                                                                                                                                                                                                                                                                                                                                                                                                                                                                            |
| 3      | "configuration_manager": "{ 'data_identifier': 'nnUNetPlans_2d', 'preprocessor_name': 'DefaultPreprocessor', 'batch_size': 100, 'patch_size': [256, 224], 'median_image_size_in_voxels': [233.0, 197.0], 'spacing': [1.0, 1.0], 'normalization_schemes': ['ZScoreNormalization', 'ZScoreNormalization', 'ZScoreNormalization', 'ZScoreNormalization'], 'use_mask_for_norm': [False, False, False, False], 'UNet_class_name': 'PlainConvUNet', 'UNet_base_num_features': 32, 'n_conv_per_stage_encoder': [2, 2, 2, 2, 2, 2], 'n_conv_per_stage_decoder': [2, 2, 2, 2, 2], 'num_pool_per_axis': [5, 5], 'pool_op_kernel_sizes': [[1, 1], [2, 2], [2, 2], [2, 2], [2, 2], [2, 2]], 'conv_kernel_sizes': [[3, 3], [3, 3], [3, 3], [3, 3], [3, 3], [3, 3]], 'unet_max_num_features': 512, 'resampling_fn_data': 'resample_data_or_seg_to_shape', 'resampling_fn_seg': 'resample_data_or_seg_to_shape', 'resampling_fn_data_kwargs': {'is_seg': False, 'order': 3, 'order_z': 0, 'force_separate_z': None}, 'resampling_fn_seg_kwargs': {'is_seg': True, 'order': 1, 'order_z': 0, 'force_separate_z': None}, 'resampling_fn_probabilities': 'resample_data_or_seg_to_shape', 'resampling_fn_probabilities_kwargs': {'is_seg': False, 'order': 1, 'order_z': 0, 'force_separate_z': None}, 'batch_dice': True}",                                                                                                                                                                                                                      |
| 4      | "configuration_name": "2d",                                                                                                                                                                                                                                                                                                                                                                                                                                                                                                                                                                                                                                                                                                                                                                                                                                                                                                                                                                                                                                                                                                                                                                                                                                                                                                                                                                                                                                                                                                     |
| 5      | "cudnn_version": 8500,                                                                                                                                                                                                                                                                                                                                                                                                                                                                                                                                                                                                                                                                                                                                                                                                                                                                                                                                                                                                                                                                                                                                                                                                                                                                                                                                                                                                                                                                                                          |
| 6      | "current_epoch": "1250",                                                                                                                                                                                                                                                                                                                                                                                                                                                                                                                                                                                                                                                                                                                                                                                                                                                                                                                                                                                                                                                                                                                                                                                                                                                                                                                                                                                                                                                                                                        |
| 7      | "dataloader_train": "<nnunetv2.training.data_augmentation.custom_transforms.limited_length_multithreaded_augmenter.LimitedLenWrapper object at 0x2aabf8d86020>",                                                                                                                                                                                                                                                                                                                                                                                                                                                                                                                                                                                                                                                                                                                                                                                                                                                                                                                                                                                                                                                                                                                                                                                                                                                                                                                                                                |
| 8      | "dataloader_train.generator": "<nnunetv2.training.dataloading.data_loader_2d.nnUNetDataLoader2D object at 0x2aabf8d86b60>",                                                                                                                                                                                                                                                                                                                                                                                                                                                                                                                                                                                                                                                                                                                                                                                                                                                                                                                                                                                                                                                                                                                                                                                                                                                                                                                                                                                                     |
| 9      | "dataloader_train.num_processes": "100",                                                                                                                                                                                                                                                                                                                                                                                                                                                                                                                                                                                                                                                                                                                                                                                                                                                                                                                                                                                                                                                                                                                                                                                                                                                                                                                                                                                                                                                                                        |
| 10     | "dataloader_train.transform": "Compose ( [SpatialTransform( independent_scale_for_each_axis = True, p_rot_per_sample = 0.4, p_scale_per_sample = 0.2, p_el_per_sample = 0.2, data_key = 'data', label_key = 'seg', patch_size = [256, 224], patch_center_dist_from_border = None, do_elastic_deform = False, alpha = (0.0, 1000.0), sigma = (10.0, 13.0), do_rotation = True, angle_x = (-3.141592653589793, 3.141592653589793), angle_y = (0, 0), angle_z = (0, 0), do_scale = True, scale = (0.7, 1.43), border_mode_data = 'constant', border_cval_data = 0, order_data = 3, border_mode_seg = 'constant', border_cval_seg = -1, order_seg = 1, random_crop = False, p_rot_per_axis = 0.5, p_independent_scale_per_axis = 1 ), OneOfTransform( list_of_transforms = [MedianFilterTransform( p_per_sample = 0.2, p_per_channel = 0.5, data_key = 'data', filter_size = (2, 8), same_for_each_channel = False ), GaussianBlurTransform( p_per_sample = 0.2, different_sigma_per_channel = True, p_per_channel = 0.5, data_key = 'data', blur_sigma = (0.3, 1.5), different_sigma_per_axis = False, p_isotropic = 0 ) ], GaussianNoiseTransform( p_per_sample = 0.1, data_key = 'data', noise_variance = (0, 0.1), p_per_channel = 1, per_channel = False ), BrightnessTransform( p_per_sample = 0.1, data_key = 'data', mu = 0, sigma = 0.5, per_channel = True, p_per_channel = 0.5 ), OneOfTransform( list_of_transforms = [ContrastAugmentationTransform( p_per_sample = 0.2, data_key = 'data', contrast_range = (0.5, 2), |



|    |                                                                                                                                                                                                                                                                                                                                                                                                                                                                                                                                                                                                                                                                                                                                                                                                                                                                                                                                                                                                                                                                                                                                                                                                                                                                                                                                                                                                                                                                                                                                                                                                                                                                                                                                                                                                                                                                                                                                                                                 |
|----|---------------------------------------------------------------------------------------------------------------------------------------------------------------------------------------------------------------------------------------------------------------------------------------------------------------------------------------------------------------------------------------------------------------------------------------------------------------------------------------------------------------------------------------------------------------------------------------------------------------------------------------------------------------------------------------------------------------------------------------------------------------------------------------------------------------------------------------------------------------------------------------------------------------------------------------------------------------------------------------------------------------------------------------------------------------------------------------------------------------------------------------------------------------------------------------------------------------------------------------------------------------------------------------------------------------------------------------------------------------------------------------------------------------------------------------------------------------------------------------------------------------------------------------------------------------------------------------------------------------------------------------------------------------------------------------------------------------------------------------------------------------------------------------------------------------------------------------------------------------------------------------------------------------------------------------------------------------------------------|
|    | <p>preserve_range = True, per_channel = True, p_per_channel = 0.5 ), ContrastAugmentationTransform( p_per_sample = 0.2, data_key = 'data', contrast_range = (0.5, 2), preserve_range = False, per_channel = True, p_per_channel = 0.5 )] ), SimulateLowResolutionTransform( order_upsample = 3, order_downsample = 0, channels = None, per_channel = True, p_per_channel = 0.5, p_per_sample = 0.15, data_key = 'data', zoom_range = (0.25, 1), ignore_axes = None ), GammaTransform( p_per_sample = 0.1, retain_stats = True, per_channel = True, data_key = 'data', gamma_range = (0.7, 1.5), invert_image = True ), GammaTransform( p_per_sample = 0.1, retain_stats = True, per_channel = True, data_key = 'data', gamma_range = (0.7, 1.5), invert_image = True ), MirrorTransform( p_per_sample = 1, data_key = 'data', label_key = 'seg', axes = (0, 1) ), BlankRectangleTransform( rectangle_size = [[25, 85], [22, 74]], num_rectangles = (1, 5), force_square = False, p_per_sample = 0.4, p_per_channel = 0.5, apply_to_keys = ('data',), color_fn = &lt;function BlankRectangleTransform.__init__.&lt;locals&gt;.&lt;lambda&gt; at 0x2aabf4b8b2e0&gt; ), &lt;batchgenerators.transforms.local_transforms.BrightnessGradientAdditiveTransform object at 0x2aabf8d85960&gt;, &lt;batchgenerators.transforms.local_transforms.LocalGammaTransform object at 0x2aabf8d85930&gt;, SharpeningTransform( p_per_sample = 0.2, p_per_channel = 0.5, data_key = 'data', strength = (0.1, 1), same_for_each_channel = False ), RemoveLabelTransform( output_key = 'seg', input_key = 'seg', replace_with = 0, remove_label = -1 ), RenameTransform( delete_old = True, out_key = 'target', in_key = 'seg' ), DownsampleSegForDSTransform2( axes = None, output_key = 'target', input_key = 'target', order = 0, ds_scales = [[1.0, 1.0], [0.5, 0.5], [0.25, 0.25], [0.125, 0.125], [0.0625, 0.0625]] ), NumpyToTensor( keys = ['data', 'target'], cast_to = 'float' )] )",</p> |
| 11 | "dataloader_val": "<nnunetv2.training.data_augmentation.custom_transforms.limited_length_multithreaded_augmenter.LimitedLenWrapper object at 0x2aabf8d849d0>",                                                                                                                                                                                                                                                                                                                                                                                                                                                                                                                                                                                                                                                                                                                                                                                                                                                                                                                                                                                                                                                                                                                                                                                                                                                                                                                                                                                                                                                                                                                                                                                                                                                                                                                                                                                                                  |
| 12 | "dataloader_val.generator": "<nnunetv2.training.data_loading.data_loader_2d.nnUNetDataLoader2D object at 0x2aabf8d86da0>",                                                                                                                                                                                                                                                                                                                                                                                                                                                                                                                                                                                                                                                                                                                                                                                                                                                                                                                                                                                                                                                                                                                                                                                                                                                                                                                                                                                                                                                                                                                                                                                                                                                                                                                                                                                                                                                      |
| 13 | "dataloader_val.num_processes": "100",                                                                                                                                                                                                                                                                                                                                                                                                                                                                                                                                                                                                                                                                                                                                                                                                                                                                                                                                                                                                                                                                                                                                                                                                                                                                                                                                                                                                                                                                                                                                                                                                                                                                                                                                                                                                                                                                                                                                          |
| 14 | "dataloader_val.transform": "Compose ( [RemoveLabelTransform( output_key = 'seg', input_key = 'seg', replace_with = 0, remove_label = -1 ), RenameTransform( delete_old = True, out_key = 'target', in_key = 'seg' ), DownsampleSegForDSTransform2( axes = None, output_key = 'target', input_key = 'target', order = 0, ds_scales = [[1.0, 1.0], [0.5, 0.5], [0.25, 0.25], [0.125, 0.125], [0.0625, 0.0625]] ), NumpyToTensor( keys = ['data', 'target'], cast_to = 'float' )] )",                                                                                                                                                                                                                                                                                                                                                                                                                                                                                                                                                                                                                                                                                                                                                                                                                                                                                                                                                                                                                                                                                                                                                                                                                                                                                                                                                                                                                                                                                             |
| 15 | "dataset_json": "{ 'channel_names': { 'T1': 0, 'T1C': 1, 'T2': 2, 'Flair': 3 }, 'labels': { 'background': 0, 'mutated': 1, 'wild-type': 2 }, 'numTraining': 13660, 'file_ending': '.nii.gz', 'regions_class_order': 'TCIA FeTS002 and EGD MCon data --> SS Tio DA and with N4' }",                                                                                                                                                                                                                                                                                                                                                                                                                                                                                                                                                                                                                                                                                                                                                                                                                                                                                                                                                                                                                                                                                                                                                                                                                                                                                                                                                                                                                                                                                                                                                                                                                                                                                              |
| 16 | "device": "cuda:0",                                                                                                                                                                                                                                                                                                                                                                                                                                                                                                                                                                                                                                                                                                                                                                                                                                                                                                                                                                                                                                                                                                                                                                                                                                                                                                                                                                                                                                                                                                                                                                                                                                                                                                                                                                                                                                                                                                                                                             |
| 17 | "disable_checkpointing": "False",                                                                                                                                                                                                                                                                                                                                                                                                                                                                                                                                                                                                                                                                                                                                                                                                                                                                                                                                                                                                                                                                                                                                                                                                                                                                                                                                                                                                                                                                                                                                                                                                                                                                                                                                                                                                                                                                                                                                               |
| 18 | "fold": "1",                                                                                                                                                                                                                                                                                                                                                                                                                                                                                                                                                                                                                                                                                                                                                                                                                                                                                                                                                                                                                                                                                                                                                                                                                                                                                                                                                                                                                                                                                                                                                                                                                                                                                                                                                                                                                                                                                                                                                                    |
| 19 | "folder_with_segs_from_previous_stage": "None",                                                                                                                                                                                                                                                                                                                                                                                                                                                                                                                                                                                                                                                                                                                                                                                                                                                                                                                                                                                                                                                                                                                                                                                                                                                                                                                                                                                                                                                                                                                                                                                                                                                                                                                                                                                                                                                                                                                                 |
| 20 | "gpu_name": "NVIDIA A100-PCIE-40GB",                                                                                                                                                                                                                                                                                                                                                                                                                                                                                                                                                                                                                                                                                                                                                                                                                                                                                                                                                                                                                                                                                                                                                                                                                                                                                                                                                                                                                                                                                                                                                                                                                                                                                                                                                                                                                                                                                                                                            |
| 21 | "grad_scaler": "<torch.cuda.amp.grad_scaler.GradScaler object at 0x2aabf4b6d900>",                                                                                                                                                                                                                                                                                                                                                                                                                                                                                                                                                                                                                                                                                                                                                                                                                                                                                                                                                                                                                                                                                                                                                                                                                                                                                                                                                                                                                                                                                                                                                                                                                                                                                                                                                                                                                                                                                              |
| 22 | "hostname": "NucleusC092",                                                                                                                                                                                                                                                                                                                                                                                                                                                                                                                                                                                                                                                                                                                                                                                                                                                                                                                                                                                                                                                                                                                                                                                                                                                                                                                                                                                                                                                                                                                                                                                                                                                                                                                                                                                                                                                                                                                                                      |
| 23 | "inference_allowed_mirroring_axes": "(0, 1)",                                                                                                                                                                                                                                                                                                                                                                                                                                                                                                                                                                                                                                                                                                                                                                                                                                                                                                                                                                                                                                                                                                                                                                                                                                                                                                                                                                                                                                                                                                                                                                                                                                                                                                                                                                                                                                                                                                                                   |

|    |                                                                                                                                                                                                                                                                                                                                                                                                                                                                                                                                                                                                                                                                                                                                                                                                                                                                                                                                                                                                                                                                                                                                                                                                                                                                                                                                                                                                                                                                                                                                                                                                                                                                                                                                                                                                                                                                                                                                                                                                                                                                                                                                                                                                                                                                                                                                                                                                                                                                                                                                                                                                                                                                                                                                                                                                                                                                                                                                                                                                                                                                                                                                                                                                                                                                                                                                                                                                                                             |
|----|---------------------------------------------------------------------------------------------------------------------------------------------------------------------------------------------------------------------------------------------------------------------------------------------------------------------------------------------------------------------------------------------------------------------------------------------------------------------------------------------------------------------------------------------------------------------------------------------------------------------------------------------------------------------------------------------------------------------------------------------------------------------------------------------------------------------------------------------------------------------------------------------------------------------------------------------------------------------------------------------------------------------------------------------------------------------------------------------------------------------------------------------------------------------------------------------------------------------------------------------------------------------------------------------------------------------------------------------------------------------------------------------------------------------------------------------------------------------------------------------------------------------------------------------------------------------------------------------------------------------------------------------------------------------------------------------------------------------------------------------------------------------------------------------------------------------------------------------------------------------------------------------------------------------------------------------------------------------------------------------------------------------------------------------------------------------------------------------------------------------------------------------------------------------------------------------------------------------------------------------------------------------------------------------------------------------------------------------------------------------------------------------------------------------------------------------------------------------------------------------------------------------------------------------------------------------------------------------------------------------------------------------------------------------------------------------------------------------------------------------------------------------------------------------------------------------------------------------------------------------------------------------------------------------------------------------------------------------------------------------------------------------------------------------------------------------------------------------------------------------------------------------------------------------------------------------------------------------------------------------------------------------------------------------------------------------------------------------------------------------------------------------------------------------------------------------|
| 24 | "initial_lr": "0.01",                                                                                                                                                                                                                                                                                                                                                                                                                                                                                                                                                                                                                                                                                                                                                                                                                                                                                                                                                                                                                                                                                                                                                                                                                                                                                                                                                                                                                                                                                                                                                                                                                                                                                                                                                                                                                                                                                                                                                                                                                                                                                                                                                                                                                                                                                                                                                                                                                                                                                                                                                                                                                                                                                                                                                                                                                                                                                                                                                                                                                                                                                                                                                                                                                                                                                                                                                                                                                       |
| 25 | "is_cascaded": "False",                                                                                                                                                                                                                                                                                                                                                                                                                                                                                                                                                                                                                                                                                                                                                                                                                                                                                                                                                                                                                                                                                                                                                                                                                                                                                                                                                                                                                                                                                                                                                                                                                                                                                                                                                                                                                                                                                                                                                                                                                                                                                                                                                                                                                                                                                                                                                                                                                                                                                                                                                                                                                                                                                                                                                                                                                                                                                                                                                                                                                                                                                                                                                                                                                                                                                                                                                                                                                     |
| 26 | "is_ddp": "False",                                                                                                                                                                                                                                                                                                                                                                                                                                                                                                                                                                                                                                                                                                                                                                                                                                                                                                                                                                                                                                                                                                                                                                                                                                                                                                                                                                                                                                                                                                                                                                                                                                                                                                                                                                                                                                                                                                                                                                                                                                                                                                                                                                                                                                                                                                                                                                                                                                                                                                                                                                                                                                                                                                                                                                                                                                                                                                                                                                                                                                                                                                                                                                                                                                                                                                                                                                                                                          |
| 27 | "label_manager": "<nnunetv2.utilities.label_handling.label_handling.LabelManager object at 0x2aabf4b6d870>",                                                                                                                                                                                                                                                                                                                                                                                                                                                                                                                                                                                                                                                                                                                                                                                                                                                                                                                                                                                                                                                                                                                                                                                                                                                                                                                                                                                                                                                                                                                                                                                                                                                                                                                                                                                                                                                                                                                                                                                                                                                                                                                                                                                                                                                                                                                                                                                                                                                                                                                                                                                                                                                                                                                                                                                                                                                                                                                                                                                                                                                                                                                                                                                                                                                                                                                                |
| 28 | "local_rank": "0",                                                                                                                                                                                                                                                                                                                                                                                                                                                                                                                                                                                                                                                                                                                                                                                                                                                                                                                                                                                                                                                                                                                                                                                                                                                                                                                                                                                                                                                                                                                                                                                                                                                                                                                                                                                                                                                                                                                                                                                                                                                                                                                                                                                                                                                                                                                                                                                                                                                                                                                                                                                                                                                                                                                                                                                                                                                                                                                                                                                                                                                                                                                                                                                                                                                                                                                                                                                                                          |
| 30 | "logger": "<nnunetv2.training.logging.nnunet_logger.nnUNetLogger object at 0x2aabf4b6d7b0>",                                                                                                                                                                                                                                                                                                                                                                                                                                                                                                                                                                                                                                                                                                                                                                                                                                                                                                                                                                                                                                                                                                                                                                                                                                                                                                                                                                                                                                                                                                                                                                                                                                                                                                                                                                                                                                                                                                                                                                                                                                                                                                                                                                                                                                                                                                                                                                                                                                                                                                                                                                                                                                                                                                                                                                                                                                                                                                                                                                                                                                                                                                                                                                                                                                                                                                                                                |
| 31 | "loss": "DeepSupervisionWrapper(\n (loss): DC_and_CE_loss(\n (ce): RobustCrossEntropyLoss(\n (dc): MemoryEfficientSoftDiceLoss(\n ))\n)",                                                                                                                                                                                                                                                                                                                                                                                                                                                                                                                                                                                                                                                                                                                                                                                                                                                                                                                                                                                                                                                                                                                                                                                                                                                                                                                                                                                                                                                                                                                                                                                                                                                                                                                                                                                                                                                                                                                                                                                                                                                                                                                                                                                                                                                                                                                                                                                                                                                                                                                                                                                                                                                                                                                                                                                                                                                                                                                                                                                                                                                                                                                                                                                                                                                                                                   |
| 32 | "lr_scheduler": "<nnunetv2.training.lr_scheduler.polylr.PolyLRScheduler object at 0x2aabf4b6e6e0>",                                                                                                                                                                                                                                                                                                                                                                                                                                                                                                                                                                                                                                                                                                                                                                                                                                                                                                                                                                                                                                                                                                                                                                                                                                                                                                                                                                                                                                                                                                                                                                                                                                                                                                                                                                                                                                                                                                                                                                                                                                                                                                                                                                                                                                                                                                                                                                                                                                                                                                                                                                                                                                                                                                                                                                                                                                                                                                                                                                                                                                                                                                                                                                                                                                                                                                                                         |
| 33 | <pre> "my_init_kwargs": {'plans': {'dataset_name': 'Dataset006_TCIA_FeTS002_EGD_SS_N4_BG_Tio_MCon_data', 'plans_name': 'nnUNetPlans', 'original_median_spacing_after_transp': [1.0, 1.0, 1.0], 'original_median_shape_after_transp': [189, 233, 197], 'image_reader_writer': 'SimpleITKIO', 'transpose_forward': [0, 1, 2], 'transpose_backward': [0, 1, 2], 'configurations': {'2d': {'data_identifier': 'nnUNetPlans_2d', 'preprocessor_name': 'DefaultPreprocessor', 'batch_size': 100, 'patch_size': [256, 224], 'median_image_size_in_voxels': [233.0, 197.0], 'spacing': [1.0, 1.0], 'normalization_schemes': ['ZScoreNormalization', 'ZScoreNormalization', 'ZScoreNormalization', 'ZScoreNormalization'], 'use_mask_for_norm': [False, False, False, False], 'UNet_class_name': 'PlainConvUNet', 'UNet_base_num_features': 32, 'n_conv_per_stage_encoder': [2, 2, 2, 2, 2, 2], 'n_conv_per_stage_decoder': [2, 2, 2, 2, 2], 'num_pool_per_axis': [5, 5], 'pool_op_kernel_sizes': [[1, 1], [2, 2], [2, 2], [2, 2], [2, 2], [2, 2]], 'conv_kernel_sizes': [[3, 3], [3, 3], [3, 3], [3, 3], [3, 3], [3, 3]], 'unet_max_num_features': 512, 'resampling_fn_data': 'resample_data_or_seg_to_shape', 'resampling_fn_seg': 'resample_data_or_seg_to_shape', 'resampling_fn_data_kwargs': {'is_seg': False, 'order': 3, 'order_z': 0, 'force_separate_z': None}, 'resampling_fn_seg_kwargs': {'is_seg': True, 'order': 1, 'order_z': 0, 'force_separate_z': None}, 'resampling_fn_probabilities': 'resample_data_or_seg_to_shape', 'resampling_fn_probabilities_kwargs': {'is_seg': False, 'order': 1, 'order_z': 0, 'force_separate_z': None}, 'batch_dice': True}, '3d_fullres': {'data_identifier': 'nnUNetPlans_3d_fullres', 'preprocessor_name': 'DefaultPreprocessor', 'batch_size': 2, 'patch_size': [192, 256, 192], 'median_image_size_in_voxels': [189.0, 233.0, 197.0], 'spacing': [1.0, 1.0, 1.0], 'normalization_schemes': ['ZScoreNormalization', 'ZScoreNormalization', 'ZScoreNormalization', 'ZScoreNormalization'], 'use_mask_for_norm': [False, False, False, False], 'UNet_class_name': 'PlainConvUNet', 'UNet_base_num_features': 32, 'n_conv_per_stage_encoder': [2, 2, 2, 2, 2, 2], 'n_conv_per_stage_decoder': [2, 2, 2, 2, 2], 'num_pool_per_axis': [5, 5, 5], 'pool_op_kernel_sizes': [[1, 1, 1], [2, 2, 2], [2, 2, 2], [2, 2, 2], [2, 2, 2], [2, 2, 2]], 'conv_kernel_sizes': [[3, 3, 3], [3, 3, 3], [3, 3, 3], [3, 3, 3], [3, 3, 3], [3, 3, 3]], 'unet_max_num_features': 320, 'resampling_fn_data': 'resample_data_or_seg_to_shape', 'resampling_fn_seg': 'resample_data_or_seg_to_shape', 'resampling_fn_data_kwargs': {'is_seg': False, 'order': 3, 'order_z': 0, 'force_separate_z': None}, 'resampling_fn_seg_kwargs': {'is_seg': True, 'order': 1, 'order_z': 0, 'force_separate_z': None}, 'resampling_fn_probabilities': 'resample_data_or_seg_to_shape', 'resampling_fn_probabilities_kwargs': {'is_seg': False, 'order': 1, 'order_z': 0, 'force_separate_z': None}, 'batch_dice': False}}, 'experiment_planner_used': 'ExperimentPlanner', 'label_manager': 'LabelManager', 'foreground_intensity_properties_per_channel': {'0': {'max': 8449.001953125, 'mean': 876.2181396484375, 'median': 587.5035400390625, 'min': -62.86849594116211, 'percentile_00_5': 0.0, 'percentile_99_5': 5023.051276855462, 'std': 860.8373413085938}, '1': {'max': 22296.71484375, 'mean': 1010.2324829101562, </pre> |

|    |                                                                                                                                                                                                                                                                                                                                                                                                                                                                                                                                                                                                                                                                                                                                                                                                                                                                                                                                                                                                                                                                                                                                                                                                                                                                                                                                                                                                                                                                                                                                                                                                                                                                                                                                                                                                                                                                                                                                                                                                                                                                                                                                         |
|----|-----------------------------------------------------------------------------------------------------------------------------------------------------------------------------------------------------------------------------------------------------------------------------------------------------------------------------------------------------------------------------------------------------------------------------------------------------------------------------------------------------------------------------------------------------------------------------------------------------------------------------------------------------------------------------------------------------------------------------------------------------------------------------------------------------------------------------------------------------------------------------------------------------------------------------------------------------------------------------------------------------------------------------------------------------------------------------------------------------------------------------------------------------------------------------------------------------------------------------------------------------------------------------------------------------------------------------------------------------------------------------------------------------------------------------------------------------------------------------------------------------------------------------------------------------------------------------------------------------------------------------------------------------------------------------------------------------------------------------------------------------------------------------------------------------------------------------------------------------------------------------------------------------------------------------------------------------------------------------------------------------------------------------------------------------------------------------------------------------------------------------------------|
|    | 'median': 643.4981079101562, 'min': -217.8645782470703, 'percentile_00_5': 0.0, 'percentile_99_5': 6990.7314453125, 'std': 1197.094970703125}, '2': {'max': 13443.9501953125, 'mean': 906.3700561523438, 'median': 697.4663696289062, 'min': -311.94610595703125, 'percentile_00_5': 0.0, 'percentile_99_5': 4928.394047851558, 'std': 798.8444213867188}, '3': {'max': 11528.87890625, 'mean': 741.3021240234375, 'median': 524.4417724609375, 'min': -217.5197296142578, 'percentile_00_5': 0.0, 'percentile_99_5': 3948.712703857367, 'std': 668.06103515625}}}, 'configuration': '2d', 'fold': 1, 'dataset_json': {'channel_names': {'T1': 0, 'T1C': 1, 'T2': 2, 'Flair': 3}, 'labels': {'background': 0, 'mutated': 1, 'wild-type': 2}, 'numTraining': 13660, 'file_ending': '.nii.gz', 'regions_class_order': 'TCIA FeTS002 and EGD MCon data --> SS Tio DA and with N4'}, 'unpack_dataset': True, 'device': device(type='cuda'))",                                                                                                                                                                                                                                                                                                                                                                                                                                                                                                                                                                                                                                                                                                                                                                                                                                                                                                                                                                                                                                                                                                                                                                                               |
| 34 | "network": "PlainConvUNet",                                                                                                                                                                                                                                                                                                                                                                                                                                                                                                                                                                                                                                                                                                                                                                                                                                                                                                                                                                                                                                                                                                                                                                                                                                                                                                                                                                                                                                                                                                                                                                                                                                                                                                                                                                                                                                                                                                                                                                                                                                                                                                             |
| 35 | "num_epochs": "2000",                                                                                                                                                                                                                                                                                                                                                                                                                                                                                                                                                                                                                                                                                                                                                                                                                                                                                                                                                                                                                                                                                                                                                                                                                                                                                                                                                                                                                                                                                                                                                                                                                                                                                                                                                                                                                                                                                                                                                                                                                                                                                                                   |
| 36 | "num_input_channels": "4",                                                                                                                                                                                                                                                                                                                                                                                                                                                                                                                                                                                                                                                                                                                                                                                                                                                                                                                                                                                                                                                                                                                                                                                                                                                                                                                                                                                                                                                                                                                                                                                                                                                                                                                                                                                                                                                                                                                                                                                                                                                                                                              |
| 37 | "num_iterations_per_epoch": "250",                                                                                                                                                                                                                                                                                                                                                                                                                                                                                                                                                                                                                                                                                                                                                                                                                                                                                                                                                                                                                                                                                                                                                                                                                                                                                                                                                                                                                                                                                                                                                                                                                                                                                                                                                                                                                                                                                                                                                                                                                                                                                                      |
| 38 | "num_val_iterations_per_epoch": "50",                                                                                                                                                                                                                                                                                                                                                                                                                                                                                                                                                                                                                                                                                                                                                                                                                                                                                                                                                                                                                                                                                                                                                                                                                                                                                                                                                                                                                                                                                                                                                                                                                                                                                                                                                                                                                                                                                                                                                                                                                                                                                                   |
| 39 | "optimizer": "SGD (\nParameter Group 0\n dampening: 0\n differentiable: False\n foreach: None\n initial_lr: 0.01\n lr: 0.004141416859964053\n maximize: False\n momentum: 0.99\n nesterov: True\n weight_decay: 3e-05\n)",                                                                                                                                                                                                                                                                                                                                                                                                                                                                                                                                                                                                                                                                                                                                                                                                                                                                                                                                                                                                                                                                                                                                                                                                                                                                                                                                                                                                                                                                                                                                                                                                                                                                                                                                                                                                                                                                                                              |
| 41 | "output_folder_base":<br>"/project/radiology/ANSIR_lab/CLINICAL/UTSW/BrainTumor/shared/Chandan_processed_subjects/nnUNet_V2_database/nnUNet_trained_models/Dataset006_TCIA_FeTS002_EGD_SS_N4_BG_Tio_MCon_data/nnUNetTrainerDA5_2000epochs_nnUNetPlans_2d",                                                                                                                                                                                                                                                                                                                                                                                                                                                                                                                                                                                                                                                                                                                                                                                                                                                                                                                                                                                                                                                                                                                                                                                                                                                                                                                                                                                                                                                                                                                                                                                                                                                                                                                                                                                                                                                                              |
| 42 | "oversample_foreground_percent": "0.33",                                                                                                                                                                                                                                                                                                                                                                                                                                                                                                                                                                                                                                                                                                                                                                                                                                                                                                                                                                                                                                                                                                                                                                                                                                                                                                                                                                                                                                                                                                                                                                                                                                                                                                                                                                                                                                                                                                                                                                                                                                                                                                |
| 43 | "plans_manager": "{ 'dataset_name': 'Dataset006_TCIA_FeTS002_EGD_SS_N4_BG_Tio_MCon_data', 'plans_name': 'nnUNetPlans', 'original_median_spacing_after_transp': [1.0, 1.0, 1.0], 'original_median_shape_after_transp': [189, 233, 197], 'image_reader_writer': 'SimpleITKIO', 'transpose_forward': [0, 1, 2], 'transpose_backward': [0, 1, 2], 'configurations': {'2d': {'data_identifier': 'nnUNetPlans_2d', 'preprocessor_name': 'DefaultPreprocessor', 'batch_size': 100, 'patch_size': [256, 224], 'median_image_size_in_voxels': [233.0, 197.0], 'spacing': [1.0, 1.0], 'normalization_schemes': ['ZScoreNormalization', 'ZScoreNormalization', 'ZScoreNormalization', 'ZScoreNormalization'], 'use_mask_for_norm': [False, False, False, False], 'UNet_class_name': 'PlainConvUNet', 'UNet_base_num_features': 32, 'n_conv_per_stage_encoder': [2, 2, 2, 2, 2], 'n_conv_per_stage_decoder': [2, 2, 2, 2, 2], 'num_pool_per_axis': [5, 5], 'pool_op_kernel_sizes': [[1, 1], [2, 2], [2, 2], [2, 2], [2, 2], [2, 2]], 'conv_kernel_sizes': [[3, 3], [3, 3], [3, 3], [3, 3], [3, 3], [3, 3]], 'unet_max_num_features': 512, 'resampling_fn_data': 'resample_data_or_seg_to_shape', 'resampling_fn_seg': 'resample_data_or_seg_to_shape', 'resampling_fn_data_kwargs': {'is_seg': False, 'order': 3, 'order_z': 0, 'force_separate_z': None}, 'resampling_fn_seg_kwargs': {'is_seg': True, 'order': 1, 'order_z': 0, 'force_separate_z': None}, 'resampling_fn_probabilities': 'resample_data_or_seg_to_shape', 'resampling_fn_probabilities_kwargs': {'is_seg': False, 'order': 1, 'order_z': 0, 'force_separate_z': None}, 'batch_dice': True, '3d_fullres': {'data_identifier': 'nnUNetPlans_3d_fullres', 'preprocessor_name': 'DefaultPreprocessor', 'batch_size': 2, 'patch_size': [192, 256, 192], 'median_image_size_in_voxels': [189.0, 233.0, 197.0], 'spacing': [1.0, 1.0, 1.0], 'normalization_schemes': ['ZScoreNormalization', 'ZScoreNormalization', 'ZScoreNormalization', 'ZScoreNormalization'], 'use_mask_for_norm': [False, False, False, False], 'UNet_class_name': 'PlainConvUNet', 'UNet_base_num_features': 32, |

|    |                                                                                                                                                                                                                                                                                                                                                                                                                                                                                                                                                                                                                                                                                                                                                                                                                                                                                                                                                                                                                                                                                                                                                                                                                                                                                                                                                                                                                                                                                                                                                                                                                                                                                                                                                                                                                                          |
|----|------------------------------------------------------------------------------------------------------------------------------------------------------------------------------------------------------------------------------------------------------------------------------------------------------------------------------------------------------------------------------------------------------------------------------------------------------------------------------------------------------------------------------------------------------------------------------------------------------------------------------------------------------------------------------------------------------------------------------------------------------------------------------------------------------------------------------------------------------------------------------------------------------------------------------------------------------------------------------------------------------------------------------------------------------------------------------------------------------------------------------------------------------------------------------------------------------------------------------------------------------------------------------------------------------------------------------------------------------------------------------------------------------------------------------------------------------------------------------------------------------------------------------------------------------------------------------------------------------------------------------------------------------------------------------------------------------------------------------------------------------------------------------------------------------------------------------------------|
|    | 'n_conv_per_stage_encoder': [2, 2, 2, 2, 2], 'n_conv_per_stage_decoder': [2, 2, 2, 2, 2], 'num_pool_per_axis': [5, 5, 5], 'pool_op_kernel_sizes': [[1, 1, 1], [2, 2, 2], [2, 2, 2], [2, 2, 2], [2, 2, 2], [2, 2, 2]], 'conv_kernel_sizes': [[3, 3, 3], [3, 3, 3], [3, 3, 3], [3, 3, 3], [3, 3, 3], [3, 3, 3]], 'unet_max_num_features': 320, 'resampling_fn_data': 'resample_data_or_seg_to_shape', 'resampling_fn_seg': 'resample_data_or_seg_to_shape', 'resampling_fn_data_kwargs': {'is_seg': False, 'order': 3, 'order_z': 0, 'force_separate_z': None}, 'resampling_fn_seg_kwargs': {'is_seg': True, 'order': 1, 'order_z': 0, 'force_separate_z': None}, 'resampling_fn_probabilities': 'resample_data_or_seg_to_shape', 'resampling_fn_probabilities_kwargs': {'is_seg': False, 'order': 1, 'order_z': 0, 'force_separate_z': None, 'batch_dice': False}, 'experiment_planner_used': 'ExperimentPlanner', 'label_manager': 'LabelManager', 'foreground_intensity_properties_per_channel': {'0': {'max': 8449.001953125, 'mean': 876.2181396484375, 'median': 587.5035400390625, 'min': -62.86849594116211, 'percentile_00_5': 0.0, 'percentile_99_5': 5023.051276855462, 'std': 860.8373413085938}, '1': {'max': 22296.71484375, 'mean': 1010.2324829101562, 'median': 643.4981079101562, 'min': -217.8645782470703, 'percentile_00_5': 0.0, 'percentile_99_5': 6990.7314453125, 'std': 1197.094970703125}, '2': {'max': 13443.9501953125, 'mean': 906.3700561523438, 'median': 697.4663696289062, 'min': -311.94610595703125, 'percentile_00_5': 0.0, 'percentile_99_5': 4928.394047851558, 'std': 798.8444213867188}, '3': {'max': 11528.87890625, 'mean': 741.3021240234375, 'median': 524.4417724609375, 'min': -217.5197296142578, 'percentile_00_5': 0.0, 'percentile_99_5': 3948.712703857367, 'std': 668.06103515625}}}, |
| 46 | "save_every": "50",                                                                                                                                                                                                                                                                                                                                                                                                                                                                                                                                                                                                                                                                                                                                                                                                                                                                                                                                                                                                                                                                                                                                                                                                                                                                                                                                                                                                                                                                                                                                                                                                                                                                                                                                                                                                                      |
| 47 | "torch_version": "2.0.0",                                                                                                                                                                                                                                                                                                                                                                                                                                                                                                                                                                                                                                                                                                                                                                                                                                                                                                                                                                                                                                                                                                                                                                                                                                                                                                                                                                                                                                                                                                                                                                                                                                                                                                                                                                                                                |
| 48 | "unpack_dataset": "True",                                                                                                                                                                                                                                                                                                                                                                                                                                                                                                                                                                                                                                                                                                                                                                                                                                                                                                                                                                                                                                                                                                                                                                                                                                                                                                                                                                                                                                                                                                                                                                                                                                                                                                                                                                                                                |
| 49 | "was_initialized": "True",                                                                                                                                                                                                                                                                                                                                                                                                                                                                                                                                                                                                                                                                                                                                                                                                                                                                                                                                                                                                                                                                                                                                                                                                                                                                                                                                                                                                                                                                                                                                                                                                                                                                                                                                                                                                               |
| 50 | "weight_decay": "3e-05"                                                                                                                                                                                                                                                                                                                                                                                                                                                                                                                                                                                                                                                                                                                                                                                                                                                                                                                                                                                                                                                                                                                                                                                                                                                                                                                                                                                                                                                                                                                                                                                                                                                                                                                                                                                                                  |
| 51 | "_best_ema": "0.8365259113358365",                                                                                                                                                                                                                                                                                                                                                                                                                                                                                                                                                                                                                                                                                                                                                                                                                                                                                                                                                                                                                                                                                                                                                                                                                                                                                                                                                                                                                                                                                                                                                                                                                                                                                                                                                                                                       |
| 52 | "batch_size": "100",                                                                                                                                                                                                                                                                                                                                                                                                                                                                                                                                                                                                                                                                                                                                                                                                                                                                                                                                                                                                                                                                                                                                                                                                                                                                                                                                                                                                                                                                                                                                                                                                                                                                                                                                                                                                                     |
| 53 | "configuration_manager": '{"data_identifier": 'nnUNetPlans_2d', 'preprocessor_name': 'DefaultPreprocessor', 'batch_size': 100, 'patch_size': [256, 224], 'median_image_size_in_voxels': [233.0, 197.0], 'spacing': [1.0, 1.0], 'normalization_schemes': ['ZScoreNormalization', 'ZScoreNormalization', 'ZScoreNormalization', 'ZScoreNormalization'], 'use_mask_for_norm': [False, False, False, False], 'UNet_class_name': 'PlainConvUNet', 'UNet_base_num_features': 32, 'n_conv_per_stage_encoder': [2, 2, 2, 2, 2], 'n_conv_per_stage_decoder': [2, 2, 2, 2, 2], 'num_pool_per_axis': [5, 5], 'pool_op_kernel_sizes': [[1, 1], [2, 2], [2, 2], [2, 2], [2, 2], [2, 2]], 'conv_kernel_sizes': [[3, 3], [3, 3], [3, 3], [3, 3], [3, 3], [3, 3]], 'unet_max_num_features': 512, 'resampling_fn_data': 'resample_data_or_seg_to_shape', 'resampling_fn_seg': 'resample_data_or_seg_to_shape', 'resampling_fn_data_kwargs': {'is_seg': False, 'order': 3, 'order_z': 0, 'force_separate_z': None}, 'resampling_fn_seg_kwargs': {'is_seg': True, 'order': 1, 'order_z': 0, 'force_separate_z': None}, 'resampling_fn_probabilities': 'resample_data_or_seg_to_shape', 'resampling_fn_probabilities_kwargs': {'is_seg': False, 'order': 1, 'order_z': 0, 'force_separate_z': None}, 'batch_dice': True}',                                                                                                                                                                                                                                                                                                                                                                                                                                                                                                                                   |
| 54 | "configuration_name": "2d",                                                                                                                                                                                                                                                                                                                                                                                                                                                                                                                                                                                                                                                                                                                                                                                                                                                                                                                                                                                                                                                                                                                                                                                                                                                                                                                                                                                                                                                                                                                                                                                                                                                                                                                                                                                                              |
| 55 | "cudnn_version": 8500,                                                                                                                                                                                                                                                                                                                                                                                                                                                                                                                                                                                                                                                                                                                                                                                                                                                                                                                                                                                                                                                                                                                                                                                                                                                                                                                                                                                                                                                                                                                                                                                                                                                                                                                                                                                                                   |
| 56 | "current_epoch": "1250",                                                                                                                                                                                                                                                                                                                                                                                                                                                                                                                                                                                                                                                                                                                                                                                                                                                                                                                                                                                                                                                                                                                                                                                                                                                                                                                                                                                                                                                                                                                                                                                                                                                                                                                                                                                                                 |

|    |                                                                                                                                                                                                                                                                                                                                                                                                                                                                                                                                                                                                                                                                                                                                                                                                                                                                                                                                                                                                                                                                                                                                                                                                                                                                                                                                                                                                                                                                                                                                                                                                                                                                                                                                                                                                                                                                                                                                                                                                                                                                                                                                                                                                                                                                                                                                                                                                                                                                                                                                                                                                                                                                                                                                                                                                                                                                                                                                                                                                                                                                                                                                                                                                                                                                                                                                                                                                                                                                          |
|----|--------------------------------------------------------------------------------------------------------------------------------------------------------------------------------------------------------------------------------------------------------------------------------------------------------------------------------------------------------------------------------------------------------------------------------------------------------------------------------------------------------------------------------------------------------------------------------------------------------------------------------------------------------------------------------------------------------------------------------------------------------------------------------------------------------------------------------------------------------------------------------------------------------------------------------------------------------------------------------------------------------------------------------------------------------------------------------------------------------------------------------------------------------------------------------------------------------------------------------------------------------------------------------------------------------------------------------------------------------------------------------------------------------------------------------------------------------------------------------------------------------------------------------------------------------------------------------------------------------------------------------------------------------------------------------------------------------------------------------------------------------------------------------------------------------------------------------------------------------------------------------------------------------------------------------------------------------------------------------------------------------------------------------------------------------------------------------------------------------------------------------------------------------------------------------------------------------------------------------------------------------------------------------------------------------------------------------------------------------------------------------------------------------------------------------------------------------------------------------------------------------------------------------------------------------------------------------------------------------------------------------------------------------------------------------------------------------------------------------------------------------------------------------------------------------------------------------------------------------------------------------------------------------------------------------------------------------------------------------------------------------------------------------------------------------------------------------------------------------------------------------------------------------------------------------------------------------------------------------------------------------------------------------------------------------------------------------------------------------------------------------------------------------------------------------------------------------------------------|
| 57 | "dataloader_train":<br>"<nnunetv2.training.data_augmentation.custom_transforms.limited_length_multithreaded_augmenter.LimitedLenWrapper object at 0x2aabf8d86020>,"                                                                                                                                                                                                                                                                                                                                                                                                                                                                                                                                                                                                                                                                                                                                                                                                                                                                                                                                                                                                                                                                                                                                                                                                                                                                                                                                                                                                                                                                                                                                                                                                                                                                                                                                                                                                                                                                                                                                                                                                                                                                                                                                                                                                                                                                                                                                                                                                                                                                                                                                                                                                                                                                                                                                                                                                                                                                                                                                                                                                                                                                                                                                                                                                                                                                                                      |
| 58 | "dataloader_train.generator": "<nnunetv2.training.data_loading.data_loader_2d.nnUNetDataLoader2D object at 0x2aabf8d86b60>,"                                                                                                                                                                                                                                                                                                                                                                                                                                                                                                                                                                                                                                                                                                                                                                                                                                                                                                                                                                                                                                                                                                                                                                                                                                                                                                                                                                                                                                                                                                                                                                                                                                                                                                                                                                                                                                                                                                                                                                                                                                                                                                                                                                                                                                                                                                                                                                                                                                                                                                                                                                                                                                                                                                                                                                                                                                                                                                                                                                                                                                                                                                                                                                                                                                                                                                                                             |
| 59 | "dataloader_train.num_processes": "100",                                                                                                                                                                                                                                                                                                                                                                                                                                                                                                                                                                                                                                                                                                                                                                                                                                                                                                                                                                                                                                                                                                                                                                                                                                                                                                                                                                                                                                                                                                                                                                                                                                                                                                                                                                                                                                                                                                                                                                                                                                                                                                                                                                                                                                                                                                                                                                                                                                                                                                                                                                                                                                                                                                                                                                                                                                                                                                                                                                                                                                                                                                                                                                                                                                                                                                                                                                                                                                 |
| 60 | "dataloader_train.transform": "Compose ( [SpatialTransform( independent_scale_for_each_axis = True, p_rot_per_sample = 0.4, p_scale_per_sample = 0.2, p_el_per_sample = 0.2, data_key = 'data', label_key = 'seg', patch_size = [256, 224], patch_center_dist_from_border = None, do_elastic_deform = False, alpha = (0.0, 1000.0), sigma = (10.0, 13.0), do_rotation = True, angle_x = (-3.141592653589793, 3.141592653589793), angle_y = (0, 0), angle_z = (0, 0), do_scale = True, scale = (0.7, 1.43), border_mode_data = 'constant', border_cval_data = 0, order_data = 3, border_mode_seg = 'constant', border_cval_seg = -1, order_seg = 1, random_crop = False, p_rot_per_axis = 0.5, p_independent_scale_per_axis = 1 ), OneOfTransform( list_of_transforms = [MedianFilterTransform( p_per_sample = 0.2, p_per_channel = 0.5, data_key = 'data', filter_size = (2, 8), same_for_each_channel = False ), GaussianBlurTransform( p_per_sample = 0.2, different_sigma_per_channel = True, p_per_channel = 0.5, data_key = 'data', blur_sigma = (0.3, 1.5), different_sigma_per_axis = False, p_isotropic = 0 )], GaussianNoiseTransform( p_per_sample = 0.1, data_key = 'data', noise_variance = (0, 0.1), p_per_channel = 1, per_channel = False ), BrightnessTransform( p_per_sample = 0.1, data_key = 'data', mu = 0, sigma = 0.5, per_channel = True, p_per_channel = 0.5 ), OneOfTransform( list_of_transforms = [ContrastAugmentationTransform( p_per_sample = 0.2, data_key = 'data', contrast_range = (0.5, 2), preserve_range = True, per_channel = True, p_per_channel = 0.5 ), ContrastAugmentationTransform( p_per_sample = 0.2, data_key = 'data', contrast_range = (0.5, 2), preserve_range = False, per_channel = True, p_per_channel = 0.5 )], SimulateLowResolutionTransform( order_upsample = 3, order_downsample = 0, channels = None, per_channel = True, p_per_channel = 0.5, p_per_sample = 0.15, data_key = 'data', zoom_range = (0.25, 1), ignore_axes = None ), GammaTransform( p_per_sample = 0.1, retain_stats = True, per_channel = True, data_key = 'data', gamma_range = (0.7, 1.5), invert_image = True ), GammaTransform( p_per_sample = 0.1, retain_stats = True, per_channel = True, data_key = 'data', gamma_range = (0.7, 1.5), invert_image = True ), MirrorTransform( p_per_sample = 1, data_key = 'data', label_key = 'seg', axes = (0, 1) ), BlankRectangleTransform( rectangle_size = [[25, 85], [22, 74]], num_rectangles = (1, 5), force_square = False, p_per_sample = 0.4, p_per_channel = 0.5, apply_to_keys = ('data',), color_fn = <function BlankRectangleTransform.__init__.<locals>.<lambda> at 0x2aabf4b8b2e0> ), <batchgenerators.transforms.local_transforms.BrightnessGradientAdditiveTransform object at 0x2aabf8d85960>, <batchgenerators.transforms.local_transforms.LocalGammaTransform object at 0x2aabf8d85930>, SharpeningTransform( p_per_sample = 0.2, p_per_channel = 0.5, data_key = 'data', strength = (0.1, 1), same_for_each_channel = False ), RemoveLabelTransform( output_key = 'seg', input_key = 'seg', replace_with = 0, remove_label = -1 ), RenameTransform( delete_old = True, out_key = 'target', in_key = 'seg' ), DownsampleSegForDSTransform2( axes = None, output_key = 'target', input_key = 'target', order = 0, ds_scales = [[1.0, 1.0], [0.5, 0.5], [0.25, 0.25], [0.125, 0.125], [0.0625, 0.0625]] ), NumpyToTensor( keys = ['data', 'target'], cast_to = 'float' ) ] )", |

|    |                                                                                                                                                                   |
|----|-------------------------------------------------------------------------------------------------------------------------------------------------------------------|
| 61 | "dataloader_val":<br>"<nnunetv2.training.data_augmentation.custom_transforms.limited_length_multithreaded_augmenter.LimitedLenWrapper object at 0x2aabf8d849d0>"; |
|----|-------------------------------------------------------------------------------------------------------------------------------------------------------------------|

2

3

4

5
